# Supplementary material
Source: ML conference proceedings conference paper supplement (https://openreview.net/forum?id=Z26xiZkbjgE)
Supplement: supplementary_material [file attachment]

## A Preliminaries

In this section, we recall some standard concepts and results in statistical learning theory.

**Definition A.1** (growth function). *Let  $\mathcal{F}$  be a class of functions from  $\mathcal{X} \subset \mathbb{R}^d$  to  $\{-1, +1\}$ . For any integer  $m \geq 0$ , we define the growth function of  $\mathcal{F}$  to be*

$$\Pi_{\mathcal{F}}(m) = \max_{x_i \in \mathcal{X}, 1 \leq i \leq m} |\{(f(x_1), f(x_2), \dots, f(x_m)) : f \in \mathcal{F}\}|.$$

*In particular, if  $|\{(f(x_1), f(x_2), \dots, f(x_m)) : f \in \mathcal{F}\}| = 2^m$ , then  $(x_1, x_2, \dots, x_m)$  is said to be shattered by  $\mathcal{F}$ .*

**Definition A.2** (Vapnik-Chervonenkis dimension). *Let  $\mathcal{F}$  be a class of functions from  $\mathcal{X} \subset \mathbb{R}^d$  to  $\{-1, +1\}$ . The VC-dimension of  $\mathcal{F}$ , denoted by  $\text{VC-dim}(\mathcal{F})$ , is defined as the largest integer  $m \geq 0$  such that  $\Pi_{\mathcal{F}}(m) = 2^m$ . For real-value function class  $\mathcal{H}$ , we define  $\text{VC-dim}(\mathcal{H}) := \text{VC-dim}(\text{sgn}(\mathcal{H}))$ .*

The following result gives a nearly-tight upper bound on the VC-dimension of neural networks.

**Lemma A.3.** (*Bartlett et al., 2019, Theorem 6*) *Consider a ReLU network with  $L$  layers and  $W$  total parameters. Let  $F$  be the set of (real-valued) functions computed by this network. Then we have  $\text{VC-dim}(F) = O(W \log(WL))$ .*

The growth function is connected to the VC-dimension via the following lemma; see e.g. (*Anthony et al., 1999, Theorem 7.6*).

**Lemma A.4.** *Suppose that  $\text{VC-dim}(\mathcal{F}) = k$ , then  $\Pi_m(\mathcal{F}) \leq \sum_{i=0}^k \binom{m}{i}$ . In particular, we have  $\Pi_m(\mathcal{F}) \leq (em/k)^k$  for all  $m > k + 1$ .*

**Lemma A.5.** (*Mohri et al., 2018, Corollary 3.4*) *Let  $H$  be a family of functions taking values in  $\{-1, +1\}$  with VC-dimension  $k$ . Then, for any  $\delta > 0$ , with probability at least  $1 - \delta$  over  $m$ -samples training dataset  $S$  i.i.d. drawn from the data distribution  $D$ , the following holds for all  $h \in H$ :*

$$\mathcal{L}_D(h) \leq \mathcal{L}_S(h) + \sqrt{\frac{2k \log \frac{em}{k}}{m}} + \sqrt{\frac{\log \frac{1}{\delta}}{2m}},$$

where  $\mathcal{L}_D(h)$  and  $\mathcal{L}_S(h)$  denote the standard test error and training error, respectively.

For deriving upper and lower bounds in the context of  $\ell_2$ -robustness, we also need to introduce the following concepts.

**Definition A.6** ( $\epsilon$ -covering). *Given a set  $\Theta \subset \mathbb{R}^d$ , we say that  $X = \{\mathbf{x}_1, \mathbf{x}_2, \dots, \mathbf{x}_n\} \subset \Theta$  is a  $\delta$ -covering of  $\Theta$  if  $\Theta \subset \cup_{i=1}^n \mathcal{B}_2(\mathbf{x}_i, \delta)$ . The covering number  $\mathcal{C}(\Theta, \delta)$  is defined as the minimal size of a  $\delta$ -covering set of  $\Theta$ .*

The following proposition is straightforward from the definition.

**Proposition A.7.** *Let  $\Theta \subset \mathbb{R}^d$  has volume (i.e. Lebesgue measure)  $V$ , then*

$$\mathcal{C}(\Theta, \delta) \geq v_d \cdot \delta^{-d} V,$$

where  $v_d$  is the volume of a  $d$ -dimensional unit ball.

**Definition A.8** ( $\epsilon$ -packing). *Given a set  $\Theta \subset \mathbb{R}^d$ , we say that  $X = \{\mathbf{x}_1, \mathbf{x}_2, \dots, \mathbf{x}_n\} \subset \Theta$  is a  $\delta$ -packing of  $\Theta$  if  $\|\mathbf{x}_i - \mathbf{x}_j\|_2 \geq \delta, \forall i \neq j$ . The packing number  $\mathcal{P}(\Theta, \delta)$  is defined as the maximal size of a  $\delta$ -packing set of  $\Theta$ .*

The relationship between the covering and packing number is given by the following result. For completeness, we also provide a simple proof.

**Proposition A.9.** *For any  $\delta \geq 0$ , we have  $\mathcal{P}(\Theta, \delta) \geq \mathcal{C}(\Theta, \delta)$ .*

*Proof.* Consider a maximal packing  $X = \{\mathbf{x}_1, \mathbf{x}_2, \dots, \mathbf{x}_n\}$ . Pick any  $\mathbf{x} \in \Theta$ , then there must exists some  $\mathbf{x}_i \in X$  such that  $\|\mathbf{x} - \mathbf{x}_i\|_2 \leq \delta$ ; otherwise,  $X \cup \{\mathbf{x}\}$  is a larger packing set, which contradicts the definition of  $X$ .

Hence it must holds that  $\Theta \subset \cup_{i=1}^n \mathcal{B}_2(\mathbf{x}_i, \delta)$  i.e.  $X$  is a  $\delta$ -covering of  $\Theta$ . The conclusion follows.  $\square$

## B Proofs for Section 2

To prove Theorem 2.2, we first recall some well-known results of neural networks for approximating simple functions.

**Lemma B.1.** *Let  $\varepsilon > 0$ ,  $0 < a < b$  and  $B \geq 1$  be given.*

- (1). (Yarotsky, 2017, Proposition 3) *There exists a function  $\tilde{\times} : [0, B]^2 \rightarrow [0, B^2]$  computed by a ReLU network with  $\mathcal{O}(\log^2(\varepsilon^{-1}B))$  parameters such that*

$$\sup_{x,y \in [0,B]} |\tilde{\times}(x,y) - xy| \leq \varepsilon,$$

*and  $\tilde{\times}(x,y) = 0$  if  $xy = 0$ .*

- (2). (Telgarsky, 2017, Lemma 3.5) *There exists a function  $R : [a, b] \rightarrow \mathbb{R}_+$  computed by a ReLU network with  $\mathcal{O}(\log^4(a^{-1}b) \log^3(\varepsilon^{-1}b))$  parameters such that  $\sup_{[a,b]} |R(x) - \frac{1}{x}| \leq \varepsilon$ .*

The following lemma establishes uniform approximation of polynomials and is a slight generalization of (Telgarsky, 2017, Lemma 3.4).

**Lemma B.2.** *Let  $\varepsilon \in (0, 1)$ . Suppose that  $P(x) = \sum_{k=1}^s \alpha_k \prod_{i=1}^{r_k} (x_{k,i} - a_{k,i})$  is a polynomial with  $\max_k r_k = r$  and  $\alpha_k, a_{k,i} \in [0, 1], \forall 1 \leq k \leq s, 1 \leq i \leq r_k$ , and  $P(x) \in [-1, +1]$  for  $\forall x \in [0, 1]^d$ . Then there exists a function  $N(x)$  computed by a ReLU network with  $\mathcal{O}(sr \log(\varepsilon^{-1}sr))$  parameters such that  $\sup_{[0,1]^d} |P(x) - N(x)| \leq \varepsilon$ .*

*Proof.* It suffices to show that each monomial  $P_k(x) = \prod_{i=1}^{r_k} (x_{k,i} - a_{k,i})$  can be  $\varepsilon$ -approximated using  $\mathcal{O}(r \log(\varepsilon^{-1}r))$  parameters. Firstly, we need at most  $r_k \leq r$  parameters to obtain  $x_{k,i} - a_{k,i}, 1 \leq i \leq r_k$  from a linear transformation. We can then apply Lemma B.1 to perform successive multiplication. Note that we still have  $|x_{k,i} - a_{k,i}| \leq 1$ , which can be used to control the cumulative error of  $\tilde{\times}$ .  $\square$

We are now ready to prove Theorem 2.2. For convenience, we restate this theorem below.

**Theorem B.3.** *Suppose that  $\mathcal{D} \subset \mathcal{B}_p(0, 1)$  with  $p \in \{2, +\infty\}$  consists of  $N$  data, and the two classes in  $\mathcal{D}$  are  $2\varepsilon$ -separated (cf. Definition 1.1), where  $\varepsilon \in (0, \frac{1}{2})$  is a constant. Let robustness radius  $\delta < \frac{1}{2}\varepsilon$ , then there exists a classifier  $f$  represented by a ReLU network with at most*

$$\mathcal{O}(Nd \log(\delta^{-1}d) + N \cdot \text{polylog}(\delta^{-1}N))$$

*parameters, such that  $\hat{\mathcal{L}}_{\mathcal{D}}^{p,\delta}(f) = 0$ .*

*Proof.* (1). The case  $p = 2$ . First, we choose  $C, \varepsilon_1, \varepsilon_2 > 0$  and  $m \in \mathbb{Z}_+$  that satisfy

$$C((\delta^2 + \varepsilon_1)^m + \varepsilon_2) \leq \frac{1}{4} < 4N \leq C((R^2 - \varepsilon_1)^m - \varepsilon_2). \quad (2)$$

These constants will be specified later. Since for  $\forall \mathbf{x}_0 \in [0, 1]^d$ ,  $\mathbf{x} \rightarrow \|\mathbf{x} - \mathbf{x}_0\|^2$  is a polynomial that consists of  $d$  monomials and with degree 2, satisfying the conditions in Lemma B.2, there exists a function  $\phi_1$  computed by a ReLU network with  $\mathcal{O}(d \log(\varepsilon_1^{-1}d))$  parameters such that  $\sup_{\mathbf{x} \in [0,1]^d} |\phi_1(\mathbf{x}) - \|\mathbf{x} - \mathbf{x}_0\|^2| \leq \varepsilon_1$ . We may further assume that  $\phi([0, 1]^d) \subset [0, 1]$ , or otherwise we can consider  $\sigma(\phi_1(\mathbf{x})) - \sigma(\phi_1(\mathbf{x}) - 1)$  instead.

Applying Lemma B.2 again, we can see that the function  $x \rightarrow x^m$  on  $[0, 1]$  can be approximated with error  $\varepsilon_2$  by a function  $\phi_2$  computed by a ReLU network with  $\mathcal{O}(m \log(\varepsilon_1^{-1}m))$  parameters. Now we can see that  $1 + C \cdot \phi_2 \circ \phi_1$  is computable by a ReLU network and takes value in  $[1, \frac{5}{4}]$  when  $\mathbf{x} \in \mathcal{B}(\mathbf{x}_0, \delta)$  and in  $(4N + 1, C + 1)$  when  $\mathbf{x} \notin \mathcal{B}(\mathbf{x}_0, R)$  (since  $R \leq 1$ ).

The final step is to choose  $\phi_3$  computed by a ReLU network with  $\mathcal{O}(\log^4 C \log^3(NC))$  parameters such that it approximates  $\frac{1}{x}$  on  $[1, C + 1]$  with error  $< \frac{1}{4N}$ . Hence  $\phi_3 \circ (1 + C \cdot \phi_2 \circ \phi_1)$  is larger

than  $\frac{3}{4}$  inside  $\mathcal{B}(\mathbf{x}_0, \delta)$  and smaller than  $\frac{1}{2N}$  outside  $\mathcal{B}(\mathbf{x}_0, R)$ . This construction uses a total of  $\mathcal{O}(W)$  parameters, where

$$W = d \log(\varepsilon_1^{-1} d) + m \log(\varepsilon_2^{-1} m) + \log^4 C \log^3(NC). \quad (3)$$

Finally, we choose

$$\varepsilon_1 = \frac{R\delta(R-\delta)}{R+\delta}, \quad m = \max\left\{1, \log \frac{32N\delta}{R}\right\}, \quad \varepsilon_2 = \frac{1}{33N} \left(\frac{R(R^2+\delta^2)}{R+\delta}\right)^m,$$

and  $C = \frac{4N}{(R^2-\varepsilon_1)^{m-\varepsilon_2}} = \mathcal{O}(N\delta^{-2m})$ , which satisfies (2). Plugging all expressions into (3), we can see that

$$W = \mathcal{O}\left(d(\log d + \log \delta^{-1} + \log(R-\delta)^{-1}) + \log^7(\delta^{-1}N)\right).$$

We denote this construction by  $\psi(\mathbf{x}; \mathbf{x}_0, \boldsymbol{\theta})$ , where  $\boldsymbol{\theta}$  consists of all parameters. The arguments above show that there exists  $\boldsymbol{\theta} = \boldsymbol{\theta}(\mathbf{x}_0)$  such that  $\psi(\mathbf{x}; \mathbf{x}_0, \boldsymbol{\theta}) > \frac{3}{4}$  when  $\mathbf{x} \in \mathcal{B}(\mathbf{x}_0, \delta)$  and  $\psi(\mathbf{x}; \mathbf{x}_0, \boldsymbol{\theta}) < \frac{1}{2N}$  when  $\mathbf{x} \notin \mathcal{B}(\mathbf{x}_0, R)$ . Consider the function  $\Psi(\mathbf{x}; \boldsymbol{\theta}_{1:N}) = 4 \sum_{i=1}^N \psi(\mathbf{x}; \mathbf{x}_i, \boldsymbol{\theta}_i) - \frac{5}{2}$ . The total number of parameters in  $\Psi$  is  $\tilde{\mathcal{O}}(Nd)$ . Moreover, if we choose  $\boldsymbol{\theta}_i = \boldsymbol{\theta}(\mathbf{x}_i)$  when  $y_i = 1$  and  $\boldsymbol{\theta}_i = 0$  when  $y_i = -1$ , then  $\Psi$  satisfies the condition in Theorem B.3.

(2). *The case  $p = \infty$ .* To obtain the same result under the  $\ell_\infty$  norm, it suffices to construct a neural network with size  $\mathcal{O}(d)$  parameters to represent the function  $\mathbf{x} \rightarrow \|\mathbf{x} - \mathbf{x}_0\|_\infty$ ; the remaining steps are exactly the same with the  $\ell_2$  case.

Let  $x^{(i)}$  denote the  $i$ -th coordinate of  $\mathbf{x}$ , then  $\|\mathbf{x} - \mathbf{x}_0\|_\infty = \max_{1 \leq i \leq d} |x^{(i)} - x_0^{(i)}|$ . Since

$$|a| = \frac{1}{2} (\max\{a, 0\} + \max\{-a, 0\}),$$

we can see that  $x^{(i)} \rightarrow |x^{(i)} - x_0^{(i)}|$  can be represented by a constant-size ReLU network. Moreover, the function  $\max\{a, b\} = \frac{1}{2}(|a+b| + |a-b|)$ , so that the function  $(a_1, a_2, \dots, a_d) \rightarrow \max_{1 \leq i \leq d} a_i$  can be represented with  $\mathcal{O}(d)$  parameters. To summarize,  $\mathbf{x} \rightarrow \|\mathbf{x} - \mathbf{x}_0\|_\infty$  can be represented using a ReLU network of size  $\mathcal{O}(d)$ , as desired.  $\square$

In the following, we prove Theorem 2.3.

**Theorem B.4** (Restatement of Theorem 2.3). *Let  $p \in \{2, +\infty\}$  and  $\mathcal{F}_n$  be the set of functions represented by some ReLU network with at most  $n$  parameters. If for any  $2\epsilon$ -separated data set  $\mathcal{D}$  under  $\ell_p$  norm, there exists a classifier  $f \in \mathcal{F}_n$  such that  $\hat{\mathcal{L}}_{\mathcal{D}}^{p,\delta}(f) = 0$ , then it must hold that  $n = \Omega(\sqrt{Nd})$ .*

*Proof.* It follows from the assumption that given any data points  $\mathbf{x}_1, \mathbf{x}_2, \dots, \mathbf{x}_N$  which are pairwise  $2\epsilon$ -separated, there exists  $f \in \mathcal{F}_n$  being able to achieve zero training error for any binary label. It directly follows from (Gao et al., 2019, Theorem 6.1) that

$$\text{VC-dim}(\mathcal{F}_n) = \Omega(Nd).$$

On the other hand, suppose that  $L \neq n$  is the depth of the neural network, then we have

$$\text{VC-dim}(\mathcal{F}_n) = \mathcal{O}(nL \log(nL)) = \mathcal{O}(n^2).$$

As a result, it follows that  $n = \tilde{\Omega}(\sqrt{Nd})$ , as desired.  $\square$

## C Proofs for Section 3

### C.1 Proof of Theorem 3.3

The proof idea of Theorem 3.3 has two key steps. First, we construct a Lipschitz classifier  $f^*$  based on distance function between a point and a close set that can  $\epsilon$ -robustly classify  $A, B$ . Then we regard  $f^*$  as the target function and use a ReLU network to approximate it to derive the  $c\epsilon$ -robust classifier. Before proving the theorem, we first introduce the two following useful conclusions, which also corresponding to the two steps of proof.

**Proposition C.1.** For the separable  $A, B \subset [0, 1]^d$ , we define  $f^*(\mathbf{x}) := \frac{d_\infty(\mathbf{x}, B) - d_\infty(\mathbf{x}, A)}{d_\infty(\mathbf{x}, A) + d_\infty(\mathbf{x}, B)}$ , which has the following properties:

1.  $f^*(\mathbf{x})$  can classify  $A, B$  correctly i.e.  $f^*(\mathbf{x}) = \begin{cases} 1, & \mathbf{x} \in A \\ -1, & \mathbf{x} \in B \end{cases}$ .
2.  $f^*(\mathbf{x})$  is a  $\epsilon$ -robust classifier i.e. for any perturbed input  $\mathbf{x}'$  that satisfies  $\|\mathbf{x}' - \mathbf{x}\|_\infty \leq \epsilon$  can also be classified correctly.
3.  $f^*(\mathbf{x})$  is  $\frac{1}{\epsilon}$ -Lipschitz w.r.t.  $\ell_\infty$  norm.

We can check these properties by the continuity and 1-Lipschitz property of distance function  $d_\infty(p, S)$ .

**Lemma C.2.** For any  $L$ -lipschitz function  $f$  in  $[0, 1]^d$ , there exists a function  $\tilde{f}$  implemented by ReLU network with at most  $c_1(c_2\epsilon/L)^{-d}(d^2 + d \log d + d \log(1/\epsilon))$  parameters that satisfies  $|f(\mathbf{x}) - \tilde{f}(\mathbf{x})| \leq \epsilon$  for any  $\mathbf{x} \in [0, 1]^d$ , where  $c_1$  and  $c_2$  are constants.

This lemma provides a useful approximation tool for us, which is an improved version of Theorem 1 in Yarotsky (2017). Compared with Theorem 1 in Yarotsky (2017), we use Lipschitz property of function instead of high-order differentiability and focus on not the bound order when  $\epsilon$  goes to zero but also more accurate bound order depending on  $\epsilon, L$  and  $d$ . By a refined analysis of total approximation error, we can derive this lemma.

*Proof of Theorem 3.3.* By Lemma C.2, we can approximate  $f^*$  in Lemma C.1 satisfying uniform error at most  $1-c$  via a ReLU network  $f$  with at most  $c_1(c_2(1-c)\epsilon)^{-d}(d^2 + d \log d + d \log(1/(1-c)))$  parameters. Then, we prove the theorem by contradiction. Assume that there exists some perturbed input  $\mathbf{x}'$  that is mis-classified and the original input  $\mathbf{x}$  is in  $A$ . So we know  $f(\mathbf{x}') < 0$  and  $f^*(\mathbf{x}) < \epsilon'$ . This implies  $d_\infty(\mathbf{x}', A) < d_\infty(\mathbf{x}', B) < \frac{1+\epsilon'}{1-\epsilon'} d_\infty(\mathbf{x}', A)$ . Combined with  $d_\infty(\mathbf{x}', A) + d_\infty(\mathbf{x}', B) \geq d_\infty(A, B) \geq 2\epsilon$ , we have  $d_\infty(\mathbf{x}', A) > (1 - \epsilon')\epsilon = c\epsilon$ , which is the contradiction.  $\square$

## C.2 Proof of Theorem 3.4

The main idea of proof is to estimate the lower bound of the family's VC-dimension via the definition of  $c\epsilon$ -robust family.

*Proof of Theorem 3.4.* The key idea is to find some discrete points that can be shattered by the function family  $\mathcal{F}_n$ .

(1). *The  $p = \infty$  case.* We use  $K$  to denote  $\lfloor \frac{1}{2\epsilon} \rfloor + 1$ , and we can divide  $[0, 1]^d$  into  $(K - 1)^d$  non-overlapping sub-cubes. Let  $S$  be the set of all the vertices of sub-cubes, which has  $K^d$  elements and can be represented by

$$S = \{\mathbf{x}_1, \mathbf{x}_2, \dots, \mathbf{x}_{K^d}\} = \{(2\epsilon i_1, 2\epsilon i_2, \dots, 2\epsilon i_d) | 0 \leq i_1, i_2, \dots, i_d < K\}.$$

For any partition  $I, J$  of  $[K^d]$  ( $I \cap J = \Phi, I \cup J = [K^d]$ ), let  $A = \{\mathbf{x}_i | i \in I\}$  and  $B = \{\mathbf{x}_j | j \in J\}$  be the positive and negative classes. Then we have  $d_\infty(A, B) \geq 2\epsilon$ . By the definition of  $c\epsilon$ -robust classifier family, there exists a classifier  $f \in \mathcal{F}$  classify  $A, B$  correctly. Thus, the family  $\mathcal{F}$  shatter the subset  $S \subset [0, 1]^d$ . By using the conclusion of Lemma A.3, we have  $K^d \leq \text{VC-dim}(\mathcal{F}) = \mathcal{O}(WL \log(N)) = \mathcal{O}(W^2 \log(W))$  where  $L$  is the depth of networks and  $W$  is the total number of parameters.

(2). *The  $p = 2$  case.* Similar to the case of  $p = \infty$ , we need to construct a set  $S \subset \mathcal{B}_2(0, 1)$  such that the  $\ell_2$ -distance between any two points in  $S$  is at least  $2\epsilon$ .

Specifically, we choose  $S$  to be a  $2\epsilon$ -packing of  $\mathcal{B}_2(0, 1)$  with maximal size. Then we have that  $|S| \geq \mathcal{P}(\mathcal{B}_2(0, 1), 2\epsilon) \geq \mathcal{C}(\mathcal{B}_2(0, 1), 2\epsilon) \geq (2\epsilon)^{-d}$ , by Propositions A.7 and A.9. Similar to the  $p = \infty$  case, robustness implies that  $S$  can be shattered by  $\mathcal{F}_n$ , so that  $K^d = \mathcal{O}(W^2 \log W)$  and the conclusion follows.  $\square$

## D Proofs for Section 4

In this section, we present the proof of Theorem 4.3 and 4.4.

**Theorem D.1** (Restatement of Theorem 4.3). *Let  $\epsilon \in (0, 1)$  be a small constant,  $p \in \{2, \infty\}$  and  $\mathcal{F}_n$  be the set of functions represented by ReLU networks with at most  $n$  parameters. There exists a sequence  $N_d = \Omega\left((2\epsilon)^{-\frac{d-1}{6}}\right)$ ,  $d \geq 1$  and a universal constant  $C > 0$  such that the following holds: for any  $c \in (0, 1)$ , there exists two linear separable sets  $A, B \subset [0, 1]^d$  that are  $2\epsilon$ -separated under  $\ell_p$ -norm, such that for any  $\mu_0$ -balanced distribution  $P$  on the supporting set  $S = A \cup B$  and robust radius  $c\epsilon$  we have*

$$\inf \{\mathcal{L}_P^{p, c\epsilon}(f) : f \in \mathcal{F}_{N_d}\} \geq C\mu_0.$$

*Proof.* (1). The  $p = \infty$  case. Define

$$S_\phi = \left\{ \left( \frac{i_1}{K}, \frac{i_2}{K}, \dots, \frac{i_{d-1}}{K}, \frac{1}{2} + c\epsilon \cdot \phi(i_1, i_2, \dots, i_{d-1}) \right) : 1 \leq i_1, i_2, \dots, i_{d-1} \leq K \right\},$$

and

$$\tilde{S} = \left\{ \left( \frac{i_1}{K}, \frac{i_2}{K}, \dots, \frac{i_{d-1}}{K}, \frac{1}{2} \right) : 1 \leq i_1, i_2, \dots, i_{d-1} \leq K \right\},$$

where  $K = \lfloor \frac{1}{2\epsilon} \rfloor$ , and  $\phi : \{1, 2, \dots, K\}^{d-1} \rightarrow \{-1, +1\}$  be an arbitrary mapping. For a vector  $\mathbf{x} \in \mathbb{R}^d$ , we use  $x^{(i)}$  to denote its  $i$ -th component. Let  $A_\phi = S_\phi \cap \{\mathbf{x} \in \mathbb{R}^d : x^{(d)} > \frac{1}{2}\}$ ,  $B_\phi = S_\phi - A_\phi$  and  $\mu$  be the uniform distribution on  $S$ . It's easy to see that  $A$  and  $B$  are linear separable by the hyperplane  $x^{(d)} = \frac{1}{2}$ . Moreover, we clearly have  $d(A, B) \geq 2\epsilon$ . We will show that there exists some choice of  $\phi$  such that robust classification of  $A_\phi$  and  $B_\phi$  with  $(c\epsilon, 1 - \alpha)$ -accuracy requires at least  $\Omega(K^{(d-1)/6})$  parameters.

Assume that for any choices of  $\phi$ , the induced sets  $A_\phi$  and  $B_\phi$  can always be robustly classified with  $(c\epsilon, 1 - \alpha)$ -accuracy by a ReLU network with at most  $M$  parameters. Then, we can construct an *enveloping network*  $F_\theta$  with  $M - 1$  hidden layers,  $M$  neurons per layer and at most  $M^3$  parameters such that any network with size  $\leq M$  can be embedded into this envelope network. As a result,  $F_\theta$  is capable of  $(c\epsilon, 1 - \alpha)$ -robustly classify any sets  $A_\phi, B_\phi$  induced by arbitrary choices of  $\phi$ . We use  $R_\phi$  to denote the subset of  $S_\phi = A_\phi \cup B_\phi$  satisfying  $|R_\phi| = (1 - \alpha)|S_\phi| = (1 - \alpha)K^{d-1}$  such that  $R_\phi$  can be  $c\epsilon$ -robustly classified.

Consider the projection operator  $\mathcal{P}$  onto the hyperplane  $x^{(d)} = \frac{1}{2}$ . For any set  $C \in \mathbb{R}^d$ , we use  $\tilde{C}$  to denote  $\mathcal{P}(C)$ . Then  $c\epsilon$ -robustness implies that the labelled data set

$$R_\phi^+ = \left\{ (x, y) : x \in \tilde{R}_\phi, y = \phi(Kx^{(1)}, \dots, Kx^{(d-1)}) \right\}$$

can be correctly classified by  $F_\theta$ , with appropriate choices of parameters.

Let  $V = \frac{1}{2}K^{d-1}$  and  $\hat{\mathcal{R}}_\phi$  be the collection of all labelled  $V$ -subset (i.e. subset of size  $V$ ) of  $R_\phi^+$ . For each  $V$ -subset  $R$  of  $\tilde{S}$ , we use  $\mathcal{G}(R)$  to denote the set of all labelings of  $R$ , so that  $|\mathcal{G}(R)| = 2^V$ .

Note that for each labelled  $V$ -subset  $T$ , there exists at most  $2^{K^{d-1}-V}$  different choices of  $\phi$  such that  $T \subset R_\phi^+$  (or, equivalently,  $T \in \hat{\mathcal{R}}_\phi$ ): this is because the value of  $\phi$  on data points in  $T$  has been specified by their labels, and there are two choices for each of the remaining  $K^{d-1} - V$  points in  $\{1, 2, \dots, K\}^{d-1}$ . As a result, we have

$$|\cup_\phi \hat{\mathcal{R}}_\phi| \geq 2^{-(K^{d-1}-V)} \sum_\phi |\hat{\mathcal{R}}_\phi| = 2^V \binom{(1-\alpha)K^{d-1}}{V}.$$

On the other hand, the total number of  $V$ -subset of  $\tilde{S}$  is  $\binom{K^{d-1}}{V}$ , thus there must exists a  $V$ -subset  $\mathcal{V}_0 \subset \tilde{S}$ , such that at least

$$\binom{K^{d-1}}{V}^{-1} \cdot 2^V \binom{(1-\alpha)K^{d-1}}{V} \geq \left( \frac{2((1-\alpha)K^{d-1} - V)}{K^{d-1} - V} \right)^V \quad (4)$$

different labelings of  $\mathcal{V}_0$  are included in  $\cup_\phi \hat{\mathcal{R}}_\phi$ . Since  $F_\theta$  can correctly classify all elements (which are  $V$ -subsets) in  $\cup_\phi \hat{\mathcal{R}}_\phi$ , it can in particular classify the set  $\mathcal{V}_0$  with at least  $\left(\frac{2((1-\alpha)K^{d-1}-V)}{K^{d-1}-V}\right)^V$  different assignments of labels. Let  $d_{VC}$  be the VC-dimension of  $F_\theta$ , then by Lemma A.4, either  $d_{VC} \geq V = \frac{1}{2}K^{d-1}$ , or

$$(2(1-2\alpha))^V \leq \left(\frac{2((1-\alpha)K^{d-1}-V)}{K^{d-1}-V}\right)^V \leq \Pi_{F_\theta}(V) \leq \left(\frac{eV}{d_{VC}}\right)^{d_{VC}},$$

where  $\Pi$  is the growth function. The RHS is increasing in  $d_{VC}$  as long as  $d_{VC} \leq V$ . When  $\alpha \leq \frac{1}{10}$ , we have  $2(1-2\alpha) > (10e)^{1/10}$ , so that  $d_{VC} \geq \frac{1}{10}V = \frac{1}{20}K^{d-1}$ . Finally, since  $F_\theta$  has at most  $M^3$  parameters, classical bounds on VC-dimension (Bartlett et al., 2019) imply that  $M = \Omega(K^{(d-1)/6})$ , as desired.

(2). *The  $p = 2$  case.* Let  $P$  be an  $2\epsilon$ -packing of the unit ball  $\mathcal{B}_{d-1}$  in  $\mathbb{R}^{d-1}$ . Since the packing number  $\mathcal{P}(\mathcal{B}_{d-1}, \|\cdot\|, 2\epsilon) \geq \mathcal{C}(\mathcal{B}_{d-1}, \|\cdot\|_2, 2\epsilon) \geq (2\epsilon)^{-(d-1)}$  by Propositions A.7 and A.9, where  $\mathcal{C}(\Theta, \|\cdot\|, \epsilon)$  is the  $\epsilon$ -covering number of a set  $\Theta$ . For any  $\lambda \in (0, 1)$ , we can consider the construction

$$S_\phi = \left\{ \left( \mathbf{x}, \frac{1}{2} + \epsilon_0 \cdot \phi(\mathbf{x}) \right) : \mathbf{x} \in P \right\},$$

where  $\phi : P \rightarrow \{-1, +1\}$  is an arbitrary mapping. It's easy to see that all points in  $S_\phi$  with first  $d-1$  components satisfying  $\|\mathbf{x}\|_2 \leq \sqrt{1 - \epsilon_0^2}$  are in the unit ball  $\mathcal{B}_d$ , so that by choosing  $\epsilon_0$  sufficiently small, we can guarantee that  $|S_\phi \cap \mathcal{B}_d| \geq \frac{1}{2}(2\epsilon)^{-(d-1)}$ . For convenience we just replace  $S_\phi$  with  $S_\phi \cap \mathcal{B}_d$  from now on.

Let  $A_\phi = S_\phi \cap \{\mathbf{x} \in \mathbb{R}^d : x^{(d)} > \frac{1}{2}\}$ ,  $B_\phi = S_\phi - A_\phi$ . It's easy to see that for arbitrary  $\phi$ , the construction is linear-separable and satisfies  $2\epsilon$ -separability. The remaining steps are just identical to the  $\ell_\infty$  case.  $\square$

**Theorem D.2** (Restatement of Theorem 4.4). *For any two linear-separable  $A, B \subset [0, 1]^d$ , a distribution  $P$  on the supporting set  $S = A \cup B$ ,  $\delta > 0$  and  $\beta > 0$ , let  $H$  be the family of  $d$ -dimensional hyperplane classifiers. Then, there exists a poly-time efficient algorithm  $\mathcal{A} : 2^S \rightarrow H$ , for  $N = \Omega(d/\beta^2)$  training instances independently randomly sampled from  $P$ , with probability  $1 - \delta$  over samples, we can use the algorithm  $\mathcal{A}$  to learn a classifier  $\hat{f} \in F$  such that*

$$\mathcal{L}_P(\hat{f}) \leq \beta,$$

where  $\mathcal{L}_P(f) := \mathbb{P}_{(x,y) \sim P}\{y \neq f(x)\}$  denotes the standard test error.

*Proof.* We i.i.d. sample  $N$  instances from the data distribution  $P$ , and use  $T$  to denote the training dataset. By Lemma A.5, with probability at least  $1 - \delta$ , we have

$$\mathcal{L}_P(h) \leq \mathcal{L}_T(h) + \mathcal{O}\left(\sqrt{\frac{d}{N}}\right), \forall h \in H$$

By conclusions of Boser et al. (1992) and results of convex optimization, we have a poly-time algorithm  $\mathcal{A} : 2^S \rightarrow H$  such that  $\mathcal{L}_T(\mathcal{A}(T)) \leq \frac{\beta}{2}$ , and we use  $\hat{f}$  to denote  $\mathcal{A}(T)$ . Finally, when  $N = \Omega(d/\beta^2)$  is sufficient large, we have  $\mathcal{L}_P(\hat{f}) \leq \frac{\beta}{2} + \frac{\beta}{2} = \beta$ .  $\square$

## E Proofs for Section 5

### E.1 Proof of Lemma 5.6

**Theorem E.1** (Restatement of Lemma 5.6). *Let  $\mathcal{M} \subset [0, 1]^d$  be a  $k$ -dimensional compact poly-partitionable Riemannian manifold with the condition number  $\tau > 0$ . For any small  $\delta > 0$  and a  $L$ -lipschitz function  $f : \mathcal{M} \rightarrow \mathbb{R}$ , there exists a function  $\hat{f}$  implemented by ReLU network with at most*

$$\tilde{\mathcal{O}}\left((\sqrt{d}L/\delta)^{-\tilde{k}}\right)$$



parameters, such that  $|f - \hat{f}| < \delta$  for any  $x \in \mathcal{M}$ , where  $\tilde{k}$  is the same as Theorem 5.5.

*Proof.* The full proof has six steps, and we finally construct a ReLU network as the following form

$$\hat{f} = \sum_{i=1}^N (\hat{f}_i \circ \phi_i) \hat{\times} (\hat{\rho}_i \circ T_i) \hat{\times} (\hat{I}_\theta \circ \hat{d}_i^2),$$

where all  $\hat{f}_i, \phi_i, \hat{\rho}_i, T_i, \hat{I}_\Delta, \hat{d}_i^2$  and  $\hat{\times}$  are implemented by sub ReLU networks, and these notation's detail will be introduced step by step.

As the above form shows, three sub-network groups will be combined by multiplication approximator  $\hat{\times}$ , where each group corresponds to a factor in the partition-of-unity-based decomposition of  $f$  (i.e.  $f = \sum_{i=1}^N f \times \rho_i \times I\{x \in U_i\}$ , and where  $\{\rho_i\}_{i \in [N]}$  satisfying  $\sum_{i \in [N]} \rho_i = 1$  is a partition of unity on an atlas  $\{U_i\}_{i \in [N]}$ ).

### Step 1: Construct poly-partition of unity on $\mathcal{M}$

Consider a open cover  $\{B_r(x)\}_{x \in \mathcal{M}}$  on  $\mathcal{M}$ , where we use  $B_r(c)$  to denote the Euclidean neighborhood with center  $c$  and radius  $r$ . Due to the compactness of manifold  $\mathcal{M}$ , we know there exists a finite open cover  $\{B_r(x_i)\}_{i \in I}$  indexed by a finite sub-index set  $I$ , which satisfies  $\mathcal{M} \subset \bigcup_{i \in I} B_r(x_i)$ .

Then, we estimate the cardinal number of index set. By the conclusions of Niyogi et al. (2008), when we select radius  $r$  satisfying  $r < \tau/2$ , we have the following lemma, which gives an lower bound of  $k$ -dimensional volume of the local neighborhood of  $\mathcal{M}$ .

**Lemma E.2.** (Niyogi et al., 2008, Lemma 5.3) *Let  $c \in \mathcal{M}$ . Now consider  $U = \mathcal{M} \cap B_r(c)$ . Then  $\text{vol}(U) \geq (\cos(\theta))^k \text{vol}(B_r^k(c))$  where  $B_r^k(c)$  is the  $k$ -dimensional ball in  $T_c$  centered at  $c$ ,  $\theta = \arcsin(r/2\tau)$ . All volumes are  $k$ -dimensional volumes where  $k$  is the dimension of  $\mathcal{M}$ .*

Recall the relation between the covering number  $\mathcal{N}(\mathcal{M}, d_2, r)$  and the packing number  $\mathcal{P}(\mathcal{M}, d_2, r)$ , and then we have

$$\begin{aligned} \mathcal{N}(\mathcal{M}, d_2, r) &\leq \mathcal{P}(\mathcal{M}, d_2, r/2) \\ &\leq \frac{\text{vol}(\mathcal{M})}{(\cos(\theta))^k \text{vol}(B_{r/2}^k(c))} \\ &\leq c_N \frac{\text{vol}(\mathcal{M})}{r^k}, \end{aligned}$$

where  $c_N$  is a constant that only exponentially depends on  $k \log k$ .

By the poly-partitionable and smoothness properties of Riemannian manifold  $\mathcal{M}$ , there exists a collection  $\{U_i, T_i, \rho_i\}_{i \in \mathcal{N}(\mathcal{M}, d_2, r)}$  such that  $\{U_i, T_i\}$  compose a tangent-space-induced atlas and  $\{\rho_i\}$  also compose a poly-partition of unity on  $\mathcal{M}$ . So we can decompose  $f$  as  $f = \sum_{i=1}^N f \rho_i$ , where we use notation  $N$  to denote  $\mathcal{N}(\mathcal{M}, d_2, r)$  so as to simplify the written process.

### Step 2: Local almost isotropic transformation via random projection

To achieve dimensional reduction of  $f$  in the local neighborhood  $U_i$ , we will use the following random projection technique proposed by Baraniuk and Wakin (2009).

**Lemma E.3.** (Baraniuk and Wakin, 2009, Theorem 3.1)

*Let  $\mathcal{M}$  be a compact  $k$ -dimensional sub-manifold of  $\mathbb{R}^d$  having condition number  $1/\tau$ . Fix  $0 < \delta < 1$  and  $0 < \eta < 1$ . Let  $A$  be a random orthoprojector from  $\mathbb{R}^d$  to  $\mathbb{R}^{\tilde{k}}$  with*

$$\tilde{k} = O\left(\frac{k \log(d \text{vol}(\mathcal{M}) \tau^{-1} \delta^{-1}) \log(1/\eta)}{\delta^2}\right).$$

*If  $\tilde{k} \leq d$ , then with probability at least  $1 - \eta$  the following statement holds: For every distinct pair of points  $x, y \in \mathcal{M}$ ,*

$$(1 - \delta) \sqrt{\frac{\tilde{k}}{d}} \leq \frac{\|Ax - Ay\|_2}{\|x - y\|_2} \leq (1 + \delta) \sqrt{\frac{\tilde{k}}{d}}.$$

Since we can select  $\eta$  is very close to 1 in order to the probability  $1 - \eta > 0$ , there exists a orthoprojector  $A_i$  for sub-manifold  $U_i$  by applying Lemma E.3. And we use  $V_r$  to denote the uniform upper bound of  $\text{vol}(U_i)$ , which makes the uniform dimension  $\tilde{k} = O(k \log d)$  for each  $i \in [N]$ . Let local almost isotropic transformation  $\phi_i(x) = \frac{1}{2}A_i(x - c_i) + \frac{1}{2}\mathbb{1}$ , where we use  $\mathbb{1}$  to denote the vector  $(1, 1, \dots, 1) \in \mathbb{R}^{\tilde{k}}$ , and then we know  $\phi_i(U_i) \subset [0, 1]^{\tilde{k}}$ .

**Step 3: Approximate Lipschitz mapping  $f \circ \phi_i^{-1}$  by  $\hat{f}_i$**

To approximate  $f \circ \phi_i^{-1} : [0, 1]^{\tilde{k}} \rightarrow \mathbb{R}$  via ReLU networks, we first caculate the Lipschitzness of it. For any pair  $x, y$  of  $\phi_i(U_i)$ , we have

$$\begin{aligned} |f \circ \phi_i^{-1}(x) - f \circ \phi_i^{-1}(y)| &\leq L \|\phi_i^{-1}(x) - \phi_i^{-1}(y)\|_\infty \\ &\leq L \|\phi_i^{-1}(x) - \phi_i^{-1}(y)\|_2 \\ &\leq \frac{2L}{1-\delta} \sqrt{\frac{d}{\tilde{k}}} \|x - y\|_2 \\ &\leq \frac{2L\sqrt{d}}{1-\delta} \|x - y\|_\infty. \end{aligned}$$

The first inequality is due to the Lipschitzness of function  $f$ . The second and last equality is the equivalence between  $\ell_2$  norm and  $\ell_\infty$  norm. The third inequality uses the isotropic property of the orthoprojector  $A_i$ . So  $f \circ \phi_i^{-1}$  is a  $\frac{2L\sqrt{d}}{1-\delta}$  Lipschitz mapping from  $[0, 1]^{\tilde{k}}$  to  $\mathbb{R}$ .

By using Lemma C.2, there exists a ReLU network  $\hat{f}_i$  with at most

$$c_1 \left( \frac{c_2 \epsilon_1 (1-\delta)}{2L\sqrt{d}} \right)^{-\tilde{k}} (\tilde{k}^2 + \tilde{k} \log \tilde{k} + \tilde{k} \log \frac{1}{\epsilon_1})$$

parameters such that for any  $x \in \phi_i(U_i)$ , we have the uniform error  $\epsilon_1$  as

$$|f \circ \phi_i^{-1}(x) - \hat{f}_i(x)| \leq \epsilon_1.$$

Notice that  $\phi_i$  is a linear mapping so that we can use a ReLU network with only one layer to represent it, which shows that we can approximate  $f$  efficiently in the local neighborhood  $U_i$ .

**Step 4: Approximate simple piecewise polynomial  $\rho_i \circ T_i^{-1}$  by  $\hat{\rho}_i$**

According to the poly-partitionable property of manifold  $M$  and Lemma B.2, there exists a ReLU network  $\hat{\rho}_i$  with at most  $O(k \log(k/\epsilon_2))$  parameters such that for any  $x \in T_i(U_i) \subset [0, 1]^k$ , we have the uniform error  $\epsilon_2$  as

$$|\rho_i \circ T_i^{-1}(x) - \hat{\rho}_i(x)| \leq \epsilon_2,$$

where  $T_i$  is composed by the tangent vectors of  $c_i$  and is scaled and translated to ensure  $T_i(U_i) \subset [0, 1]^k$ .

**Step 5: Determine the corresponding neighborhood for input**

Notice that  $\text{supp}(\rho_i) \subset U_i$  but  $\hat{\rho}_i$  may be non-zero for some point  $[0, 1]^k / T_i(U_i)$ , so we need to determine the corresponding chart for input  $x \in \mathcal{M}$  by ReLU networks. Inspired by Chen et al. (2019), we construct indicate approximator  $\hat{I}_\theta$  and  $\ell_2$  distance approximators  $\{\hat{d}_i^2\}_{i \in [N]}$  based on quadratic approximator in Lemma B.1 to approximate the neighborhood's indicator  $I\{x \in U_i\}$ , which relies upon the following identical equations

$$I\{x \in U_i\} = I\{\|x - c_i\|_2^2 < r^2\} = I\{(\cdot) < r^2\} \circ d_i^2(x),$$

where  $d_i^2(x)$  denotes the square of  $\ell_2$  distance between  $x$  and  $c_i$ . Then, if  $\hat{I}_\theta \approx I\{(\cdot) < r^2\}$  and  $\hat{d}_i^2 \approx d_i^2$ , we have  $\hat{I}_\theta \circ \hat{d}_i^2 \approx I\{(\cdot) < r^2\} \circ d_i^2 = I\{x \in U_i\}$ , which determines the corresponding chart approximately.

Assume that the uniform error of square distance approximator is  $\epsilon_q$  (i.e.  $|d_i^2 - \hat{d}_i^2| \leq \epsilon_q$  for any  $x \in [0, 1]^d$ ). In fact, functions computed by ReLU networks are piecewise linear but the indicator functions are not continuous, so we need to relax the indicator such that  $\hat{I}_\theta(x) = 1$  for  $x \leq r^2 + \epsilon_q - \theta$ ,  $\hat{I}_\theta(x) = 0$  for  $x \geq r^2 - \epsilon_q$  and  $\hat{I}_\theta$  is linear in  $(r^2 + \epsilon_q - \theta, r^2 - \epsilon_q)$ .



To correct the difference between indicator and its approximator, we will bound the value of function  $f$  such that the magnitude of  $f(x)$  is sufficient small when  $x$  is nearly on the boundary of  $U_i$ . Intuitively, for any  $y \in \partial(U_i)$ , we have

$$f\rho_i(y) = 0.$$

This is due to  $\text{supp}(\rho_i) \subset U_i$ , which implies that we only need estimate the upper bound of  $\|x - y\|_2$  for the Lipschitzness of  $f$  and smoothness of  $\rho_i$ , where  $x$  is nearly on  $\partial U_i$ . Indeed, we can prove that for any  $xU'_i := U_i/B_{\sqrt{r^2-\theta}}(c_i)$ , there exists  $y \in \partial U_i$  such that  $\|x - y\|_2 = O(\theta)$  (Chen et al., 2019, Lemma 3).

### Step 6: Estimate the total error

We combine three sub-network groups as

$$\hat{f} = \sum_{i=1}^N (\hat{f}_i \circ \phi_i) \hat{\times} (\hat{\rho}_i \circ T_i) \hat{\times} (\hat{I}_\theta \circ \hat{d}_i^2).$$

Next, we estimate the total error between  $f$  and  $\hat{f}$ . For any  $x \in M$ , we use  $g_i$  to denote  $(\hat{f}_i \circ \phi_i) \hat{\times} (\hat{\rho}_i \circ T_i)$ ,  $I_i$  to denote  $I\{x \in U_i\}$  and  $\hat{I}_i$  to denote  $\hat{I}_\theta \circ \hat{d}_i^2$ , then we have

$$\begin{aligned} |f(x) - \hat{f}(x)| &= \left| \sum_{i=1}^N f\rho_i - \sum_{i=1}^N g_i \hat{\times} \hat{I}_i \right| \\ &\leq \left| \sum_{i=1}^N f\rho_i - g_i I_i \right| + \left| \sum_{i=1}^N g_i \times I_i - g_i \hat{\times} \hat{I}_i \right| \\ &= \left| \sum_{i:x \in U_i} f\rho_i - (\hat{f}_i \circ \phi_i) \hat{\times} (\hat{\rho}_i \circ T_i) \right| + \left| \sum_{i=1}^N g_i \times I_i - g_i \hat{\times} \hat{I}_i \right| \\ &\leq \left| \sum_{i:x \in U_i} ((f \circ \phi_i^{-1} - \hat{f}_i) \circ \phi_i) \rho_i \right| + \left| \sum_{i:x \in U_i} (\hat{f}_i \circ \phi_i) \times \rho_i - (\hat{f}_i \circ \phi_i) \hat{\times} (\hat{\rho}_i \circ T_i) \right| \\ &\quad + \left| \sum_{i=1}^N g_i \times I_i - g_i \hat{\times} \hat{I}_i \right|. \end{aligned}$$

The second identical equation is due to  $\text{supp}(\rho_i) \subset U_i$ . Notice that  $\sum_{i \in [N]} \rho_i = 1$ , then the first term satisfies that

$$\left| \sum_{i:x \in U_i} ((f \circ \phi_i^{-1} - \hat{f}_i) \circ \phi_i) \rho_i \right| \leq \left( \sum_{i:x \in U_i} \rho_i \right) \max_{i:x \in U_i} \{|f \circ \phi_i^{-1} - \hat{f}_i|\} \leq \epsilon_1.$$

By the approximation of  $\hat{\times}$ , the second term satisfies that

$$\left| \sum_{i:x \in U_i} (\hat{f}_i \circ \phi_i) \times \rho_i - (\hat{f}_i \circ \phi_i) \hat{\times} (\hat{\rho}_i \circ T_i) \right| \lesssim \left| \sum_{i:x \in U_i} (\hat{f}_i \circ \phi_i) \times ((\rho_i \circ T_i^{-1} - \hat{\rho}_i) \circ T_i) \right| \leq c_f N \epsilon_2.$$

where  $c_f$  is the uniform upper bound the value of  $\{\hat{f}_i\}_{i \in [N]}$ . And the third term satisfies that

$$\left| \sum_{i=1}^N g_i \times I_i - g_i \hat{\times} \hat{I}_i \right| \lesssim \left| \sum_{i=1}^N g_i \times (I_i - \hat{I}_i) \right| \leq \sum_{i=1}^N \max_{x \in U'_i} |g_i| \lesssim \sum_{i=1}^N \max_{x \in U'_i} |f\rho_i| = O(N\theta).$$

Finally, we choose  $\epsilon_1 = O(\epsilon)$  and  $\epsilon_2 = \theta = O(\epsilon/N)$  to control the total error bounded by  $\epsilon$  and derive the upper bound for the size of network in Lemma E.1.

□

## E.2 Proof of Theorem 5.8

**Theorem E.4** (Restatement of Theorem 5.8). *Let  $\epsilon \in (0, 1)$  be a small constant. There exists a sequence  $\{N_k\}_{k \geq 1}$  that satisfies  $N_k = \Omega\left((2\epsilon\sqrt{d/k})^{-\frac{k}{2}}\right)$ , and a universal constant  $C_1 > 0$  such that the following holds: let  $\mathcal{M} \subset [0, 1]^d$  be a complete and compact  $k$ -dimensional Riemannian manifold with non-negative Ricci curvature, then there exists two  $2\epsilon$ -separated sets  $A, B \subset \mathcal{M}$  under  $\ell_\infty$  norm, such that for any  $\mu_0$ -balanced distribution  $P$  on the supporting set  $S = A \cup B$  and robust radius  $c \in (0, 1)$ , we have*

$$\inf \{\mathcal{L}_P^{\infty, ce}(f) : f \in F_{N_k}\} \geq C_1 \mu_0.$$

*Proof.* Our proof relies on the following propositions.

**Lemma E.5.** (Niyogi et al., 2008, Proposition 6.3)

*Let  $\mathcal{M}$  be a sub-manifold of  $\mathbb{R}^d$  with condition number  $1/\tau$ . Let  $p$  and  $q$  be two points in  $\mathcal{M}$  such that  $\|x - y\|_2 = r$ . Then for all  $r \leq \tau/2$ , the geodesic distance  $d_{\mathcal{M}}(p, q)$  is bounded by*

$$d_{\mathcal{M}}(x, y) \leq \tau - \tau\sqrt{1 - 2r/\tau}.$$

By Lemma E.5, we know that  $d_{\mathcal{M}}(x, y) \leq \tau - \tau\sqrt{1 - 2r/\tau} \leq 2r$  when  $r \leq \tau/2$ .

**Lemma E.6.** (Bishop, 1964, Bishop-Gromov Volume Comparison Theorem) *Let  $\mathcal{M}$  is a complete Riemannian manifold with Ricci curvature  $\text{Ric} \geq (k - 1)\iota$ , and  $p \in \mathcal{M}$  is an arbitrary point. Then the function*

$$r \mapsto \frac{\text{vol}(B_{\mathcal{M}, r}(p))}{\text{vol}(B_r^l)}$$

*is a non-increasing function which tends to 1 as  $r$  goes to 0, where  $B_{\mathcal{M}, r}(p)$  is the  $\mathcal{M}$ 's geodesic ball of radius  $r$  and center  $p$ , and  $B_r^l$  is a geodesic ball of radius  $r$  in the space form  $\mathcal{M}_l^k$ . In particular,  $\text{vol}(B_{\mathcal{M}, r}(p)) \leq \text{vol}(B_r^l)$ .*

By Lemma E.6 and the non-negativeness of  $\mathcal{M}$ 's Ricci curvature, we know  $\text{vol}(B_{\mathcal{M}, r}(c)) \leq \text{vol}(B_r^0) = r^k V_k$ , where  $V_k$  denotes the volume of the unit ball in  $\mathbb{R}^k$ . Recall the relation between the covering number  $\mathcal{N}_{\mathcal{M}}(r)$  and the packing number  $\mathcal{P}_{\mathcal{M}}(r)$  on the manifold  $\mathcal{M}$ , then we have

$$\mathcal{P}_{\mathcal{M}}(r) \geq \mathcal{N}_{\mathcal{M}}(2r) \geq \frac{\text{vol}(\mathcal{M})}{(2r)^k V_k} = \Omega\left(\frac{\text{vol}(\mathcal{M}) k^{\frac{k}{2}}}{r^k}\right).$$

By choosing  $r = 2\epsilon\sqrt{d}$ , we know that there are at least  $\Omega\left((2\epsilon\sqrt{d/k})^{-k}\right)$  points on  $\mathcal{M}$  such that the  $\ell_\infty$  distance between each pair points of these is more than  $2\epsilon$ , where we use  $\mathcal{Q}$  to denote the set of these selected points. The remain of proof is similar to the latter half of proof for Theorem D.1.

Let  $S = \mathcal{Q}$  be the supporting set. Assume that for any partition  $A, B$  of  $S$  such that  $A \cup B = S$  and  $A \cap B = \emptyset$ , there exists a classifier  $f \in F_{N_k}$  that robustly classifies  $A$  and  $B$  with at least  $1 - \alpha$  accuracy. Next, we estimate the lower and upper bounds for the cardinal number of the vector set

$$R := \{(f(x))_{x \in \mathcal{Q}} | f \in F_{N_k}\}.$$

Let  $n$  denote  $|\mathcal{Q}|$ , then we have

$$R = \{(f(x_1), f(x_2), \dots, f(x_n)) | f \in F_{N_k}\},$$

where  $\mathcal{Q} = \{x_1, x_2, \dots, x_n\}$ .

On one hand, we know that for any  $u \in \{-1, 1\}^n$ , there exists a  $v \in R$  such that  $d_H(u, v) \leq \alpha n$ , where  $d_H(\cdot, \cdot)$  denotes the Hamming distance, then we have

$$|R| \geq \mathcal{N}(\{-1, 1\}^n, d_H, \alpha n) \geq \frac{2^n}{\sum_{i=0}^{\alpha n} \binom{n}{i}}.$$

On the other hand, by applying Lemma A.4, we have

$$\frac{2^n}{\sum_{i=1}^{\alpha n} \binom{n}{i}} \leq |R| \leq \Pi_{F_{N_k}}(n) \leq \sum_{j=0}^l \binom{n}{j}.$$

where  $l$  is the VC-dimension of  $F_{N_k}$ . In fact, we can derive  $l = \Omega(n)$  when  $\alpha$  is a small constant. Assume that  $l < n - 1$ , then we have  $\sum_{j=0}^l \binom{n}{j} \leq (en/l)^l$  and  $\sum_{i=1}^{\alpha n} \binom{n}{i} \leq (e/\alpha)^{\alpha n}$ , so

$$\frac{2^n}{(e/\alpha)^{\alpha n}} \leq |R| \leq (en/l)^l.$$

We define a function  $h(x)$  as  $h(x) = (e/x)^x$ , then we derive

$$2 \leq \left(\frac{e}{\alpha}\right)^\alpha \left(\frac{e}{l/n}\right)^{l/n} = h(\alpha)h(l/n).$$

When  $\alpha$  is sufficient small,  $l/n \geq C(\alpha)$  that is a constant only depending on  $\alpha$ , which implies  $l = \Omega(n)$ . Finally, by using Lemma A.3 and  $n = |\mathcal{Q}| = \Omega\left((2\epsilon\sqrt{d/k})^{-k}\right)$ , we know  $N_k = \Omega\left((2\epsilon\sqrt{d/k})^{-\frac{k}{2}}\right)$ . Combined with the definition of balanced distribution, we conclude the proof of Theorem E.4.  $\square$
